# Supplementary material for: Fresh evidence links adiposity with multiple cancers
Source: HighWire-hosted journal article supplement (doi:10.1136/bmj.j908), 2017-02-28
Supplement: bmj.j908.pdf [file bmj.j908.pdf]

## 新证据表明肥胖症与多种癌症相关

相关性明确,需要认真考虑如何预防

### Fresh evidence links adiposity with multiple cancers

The association is now clear; it's time to get serious about prevention

来源:BMJ 2017;356:j908 doi: 10.1136/bmj.j908

国际癌症研究机构(IARC)工作组最近在回顾了流行病学数据、动物研究结果以及机制研究数据后得出结论:过量的身体脂肪会增加结直肠、肝、胆囊、胰腺、肾脏、甲状腺、乳腺(绝经后)、子宫内膜、卵巢、食管(腺癌)、胃贲门的癌症风险,还会导致神经瘤以及多发性骨髓瘤的发生<sup>1</sup>。这可能使多余的身体脂肪成为继使用烟草之后第二个重要的可控制的癌症危险因素。

Kyrgiou 及其同事<sup>2</sup>肩负起评估多项混乱的、互相重叠的荟萃(meta)分析的任务。这些研究表明身体肥胖测量值[如体质指数(BMI)、体重增加和腰围]与癌症相关。作者做了一项回顾分析,也被称为“综述的综述”或“meta 综述”<sup>3-4</sup>,纳入了204篇 meta 分析(这些分析由49篇论文数据分析而得)。他们进一步检查了95篇 meta 分析,这些分析报告了队列研究中在连续量表(主要是BMI增加在5 kg/m<sup>2</sup>以内)测量的身体脂肪与癌症之间有相关性。在对报告的效力和有效性进行了严格的评估之后,13%(12/95)的 meta 分析根据其统计标准被认为是提供强有力的证据。其余的 meta 分析被认为证据是高度提示(18%)、有提示(25%)和较弱的提示(20%)。24%的 meta 分析发现肥胖和癌症之间没有关联。

9种癌症与肥胖相关,得到强有力的

证据支持,具体包括:食管腺癌、结直肠癌(男性)、胆管癌、胰腺癌、肾癌、子宫内膜癌(绝经前妇女)、乳腺癌(绝经后)和多发性骨髓瘤。BMI与肝癌、卵巢癌、甲状腺癌,高度提示正相关;与食管鳞状细胞癌或肺癌,高度提示负相关。在肥胖类别(肥胖与正常体重相比)的亚组分析中,强有力的证据也支持肥胖个体中胃贲门癌和卵巢癌的风险增加。

IARC的报告和Kyrgiou及其同事的回顾性分析得出一致结论,多余的身体脂肪增加了大多数消化系统癌症、子宫内膜以及绝经后乳腺癌的风险。然而,对于胃贲门、肝脏、卵巢或甲状腺癌,两种方法所得证据的强度有所不同,这可以与汇总证据的方法不同有关。

首先,与IARC的报告不同,Kyrgiou及其同事的回顾分析没有评估原始 meta 分析的质量,他们只评价了可能有发表偏倚的 meta 分析,但IARC报告清楚地评估了每个 meta 分析的质量和重要性,包括检索策略、排除标准以及数据提取<sup>5</sup>,这通常不在同类综述的考虑范围之内。

其次,在评估中纳入了未达最佳标准的临床研究,例如在探讨BMI和肺癌的分析中未适当控制吸烟混杂因素,虽然仍可能提供准确的评价,但研究结果会出现方向性偏差。这也限制了证据的质量。与Kyrgiou及其同事的研究相反,IACR报告认为较高

Yikyung Park  
associate professor,  
Graham A Colditz  
professor

Division of Public  
Health Sciences,  
Washington  
University School of  
Medicine, St Louis,  
MO 63110, USA

Correspondence to:  
G A Colditz  
colditzg@wustl.edu

孙 翰 译  
杨 红 校  
北京协和医院  
消化内科

BMI与食管鳞状细胞癌和肺癌风险降低相关的研究证据不足,且不一致,部分原因是由于在已发表文献中未能很好控制吸烟和潜在偏倚等混杂因素。

最后, Kyrgiou 及其同事没有评估个体参与者数据的 meta 分析,但回顾了来自己发表 meta 分析的联合结果。对个体参与者数据的汇总分析可能是揭示肥胖与癌症之间关联的有效方式,特别是对于罕见癌症<sup>6-7</sup>、癌症亚型(不同组织学)<sup>8</sup>以及亚组(如从未吸烟者)<sup>9</sup>的分析很有意义,而个体研究和 meta 分析则通常不具备足够的效力。在肥胖症与肝癌、卵巢癌和甲状腺癌的相关性上, Kyrgiou 及其同事的研究被认为不太令人信服,其原因是研究之间的异质性或每篇 meta 分析中癌症病例较少。这两个缺点可以通过纳入大量的汇总分析来克服。虽然同类综述可以用于提供断面的证据来探索广泛的研究问题,但对于同类综述的发现,应谨慎解释,因为它们比起基于所有可获得数据得到的评估,不那么全面。

虽然有些细节还有待解决,但不可避免地从此些数据得出的结论是,防止成人超重可以降低癌症的风险。此外,新出现的证据表明,未成年人过量的身体脂肪也会对成年期的癌症风险产生不利影响<sup>6-10</sup>。鉴于医疗保健提供者在肥胖筛查和预防方面的关键作用<sup>11-12</sup>,临床医生,特别是初级医疗保健医生,可能是降低肥胖相关癌症以及与肥胖相关的许多其他慢性疾病,如糖尿病、心脏病和卒中负担的中坚力量。数据十分明确,现在是采取行动的时候了。

利益竞争(Competing interests): We have read and understood BMJ policy on declaration of interests and have no interests to declare.

来源及同行评议(Provenance and peer review): Commissioned; not peer reviewed.

## 参考文献

1 Lauby-Secretan B, Scoccianti C, Loomis D, Grosse Y, Bianchini

F, Straif K. International Agency for Research on Cancer Handbook Working Group. Body fatness and cancer—viewpoint of the IARC working group. *N Engl J Med* 2016;356:794-8. doi: 10.1056/NEJMsrl606602 pmid:27557308.

2 Kyrgiou M, Kalliala I, Markozannes G, et al. Adiposity and cancer at major anatomical sites: umbrella review of the literature. *BMJ* 2017;356:j477.

3 Higgins JPT, Green S. Cochrane handbook for systematic reviews of interventions. Version 5.1.0. 2011. www.handbook.cochrane.org. 2011.

4 Hartling L, Vandermeer B, Fernandes RM. Systematic reviews, overviews of reviews and comparative effectiveness reviews: a discussion of approaches to knowledge synthesis. *Evid Based Child Health* 2014;356:486-94. doi:10.1002/ebch.1968 pmid: 25404611.

5 Arnold M, Renehan AG, Colditz GA. Excess weight as a risk factor common to many cancer sites: words of caution when interpreting meta-analytic evidence. *Cancer Epidemiol Biomarkers Prev* 2016;cebp.0940 2016 (forthcoming). doi:10.1158/1055-9965.epi-16-0940 pmid:27908924.

6 Kitahara CM, McCullough ML, Franceschi S, et al. Anthropometric factors and thyroid cancer risk by histological subtype: pooled analysis of 22 prospective studies. *Thyroid* 2016; 356:306-18. doi:10.1089/thy.2015.0319 pmid:26756356.

7 Teras LR, Kitahara CM, Birmann BM, et al. Body size and multiple myeloma mortality: a pooled analysis of 20 prospective studies. *Br J Haematol* 2014;356:667-76. doi:10.1111/bjh.12935 pmid:24861847.

8 Morton LM, Slager SL, Cerhan JR, et al. Etiologic heterogeneity among non-Hodgkin lymphoma subtypes: the InterLymph Non-Hodgkin Lymphoma Subtypes Project. *J Natl Cancer Inst Monogr* 2014;356:130-44. doi:10.1093/jncimonographs/lgu013 pmid:25174034.

9 Gaudet MM, Kitahara CM, Newton CC, et al. Anthropometry and head and neck cancers: pooled analysis of cohort data. *Int J Epidemiol* 2015; 356:673-81. doi:10.1093/ije/dyv059 pmid:26050257.

10 Genkinger JM, Spiegelman D, Anderson KE, et al. A pooled analysis of 14 cohort studies of anthropometric factors and pancreatic cancer risk. *Int J Cancer* 2011;356:1708-17. doi: 10.1002/ijc.25794 pmid:21105029.

11 Vine M, Hargreaves MB, Briefel RR, Orfield C. Expanding the role of primary care in the prevention and treatment of childhood obesity: a review of clinic-and community-based recommendations and interventions. *J Obes* 2013;356:172035. doi:10.1155/2013/172035 pmid:23710345.

12 Kushner RF. Clinical assessment and management of adult obesity. *Circulation* 2012;356:2870-7. doi:10.1161/CIRCULATIONAHA.111.075424 pmid:23230316.

BMJ takes no responsibility for the accuracy of the translation from the published English language original and is not liable for any errors that may occur.

BMJ
